# Supplementary material for: Changes in a Comprehensive Profile of Saliva Analytes in Fattening Pigs during a Complete Productive Cycle: A Longitudinal Study
Source: MDPI journal article supplement (doi:10.3390/ani12141865), 2022-07-21
Supplement: s1 [file s1]

**Table S1.** Analytical methods employed and their lower limits of detection (LLOD).

| Method (Units)       | Reagent Provider                | LLOD                    |
|----------------------|---------------------------------|-------------------------|
| Cortisol (ng/mL)     | AlphaLISA based in-house method | 0.22                    |
| CgA (µg/mL)          | TR-IFMA based in house method   | $24.53 \times 10^{-3}$  |
| sAA (IU/mL)          | Beckman <sup>a</sup>            | $2.0 \times 10^{-3}$    |
| TEA (IU/L)           | Colorimetric in-house method    | 12.24                   |
| BChE (IU/mL)         | Colorimetric in-house method    | $2.5 \times 10^{-3}$    |
| Lip (IU/L)           | Beckman                         | 1.0                     |
| Oxytocin (pg/mL)     | AlphaLISA based in-house method | 115.6                   |
| Hp (µg/mL)           | AlphaLISA based in-house method | $22.5 \times 10^{-3}$   |
| ADA1 (IU/mL)         | Dyazime <sup>b</sup>            | $0.07 \times 10^{-3}$   |
| ADA 2 (IU/L)         | Dyazime                         | 0.07                    |
| CUPRAC (µmol/L)      | Colorimetric in-house method    | $0.0286 \times 10^{-3}$ |
| FRAS (µmol/L)        | Colorimetric in-house method    | $0.0146 \times 10^{-3}$ |
| UA (mg/dL)           | Beckman                         | 0.08                    |
| AOPP (µmol/L)        | Colorimetric in-house method    | 3.83                    |
| Pox-Act (µmol/L)     | Colorimetric in-house method    | 5.28                    |
| d-ROMs (Carr. Units) | Colorimetric in-house method    | 8.57                    |
| ALT (IU/L)           | Beckman                         | 1.0                     |
| AST (IU/L)           | Beckman                         | 1.0                     |
| ALP (IU/L)           | Beckman                         | 1.0                     |
| GGT (IU/L)           | Beckman                         | 1.0                     |
| LDH (IU/L)           | Beckman                         | 3.0                     |
| CK (IU/L)            | Beckman                         | 3.0                     |
| Urea (mg/dL)         | Beckman                         | 0.78                    |
| Creatinine (mg/dL)   | Beckman                         | 0.04                    |
| Glucose (mg/dL)      | Beckman                         | 0.73                    |
| Lactate (mmol/L)     | Beckman                         | 0.01                    |
| Calcium (mg/dL)      | Beckman                         | 0.12                    |
| Phosphorous (mg/dL)  | Beckman                         | 0.31                    |
| Proteins (mg/dL)     | Spinreact <sup>c</sup>          | 0.1                     |

TR-IFMA: Time-resolved immunofluorometric assay; CgA : chromogranin A; sAA : salivary  $\alpha$ -amylase; TEA: total esterase activity; BChE: butyrylcholinesterase; Lip: lipase; Hp: haptoglobin; ADA: adenosine deaminase; CUPRAC: cupric reducing antioxidant capacity; FRAS: ferric reducing ability of saliva; UA: uric acid; AOPP: advanced oxidation protein products; Pox-Act: hydrogen peroxide; d-ROMs: reactive oxygen-derived compounds; ALT: alanine aminotransferase; AST: aspartate aminotransferase; ALP: alkaline phosphatase; GGT:  $\gamma$ -glutamyl transferase; LDH: lactate dehydrogenase; CK: creatin kinase. <sup>a</sup>Beckman Coulter Inc., Fullerton, CA, USA. <sup>b</sup>Diazyme Laboratories, Poway, CA, USA. <sup>c</sup>Spinreact, Barcelona, Spain.
